# Supplementary material for: Iodide-enhanced Cu-MOF nanomaterials for the amplified colorimetric detection of Fe3+
Source: Royal Society of Chemistry journal article supplement (doi:10.1039/d1ay01612a), 2021-01-01
Supplement: d1ay01612a1.pdf [file d1ay01612a1.pdf]

# **Iodide-enhanced Cu-MOF Nanomaterials for the Amplified Colorimetric Detection of Fe<sup>3+</sup>**

Yan Guan, Xiao-Lan Zhao, Qiu-Xia Li, Long Huang, Jian-Mei Yang, Tong Yang, Yun-Hui Yang\* and  
Rong Hu\*

*College of Chemistry and Chemical Engineering, Yunnan Normal University, Yunnan, Kunming,  
650092, P.R. China*

\* To whom correspondence should be addressed:

E-mail: hudierong\_168@163.com, yyhui2002@aliyun.com

Phone: +86-871-65941087

Fax: 86-871-65941086

## Supplementary Figures

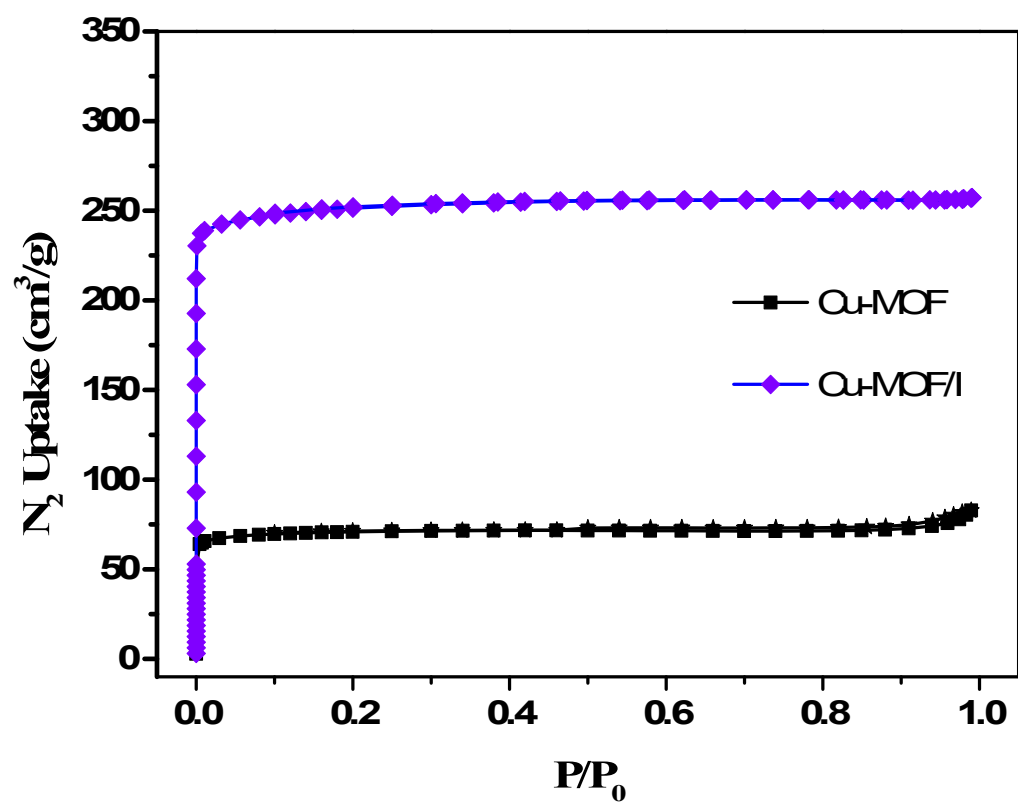

Fig.S1 Nitrogen adsorption and desorption isotherms for the MOF and MOF/I.

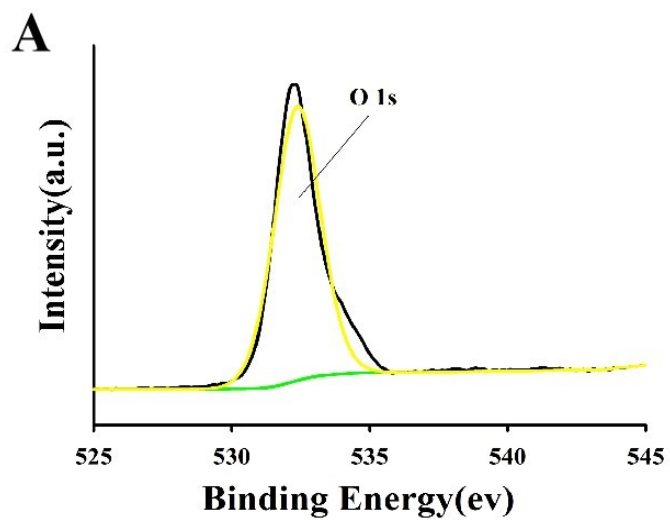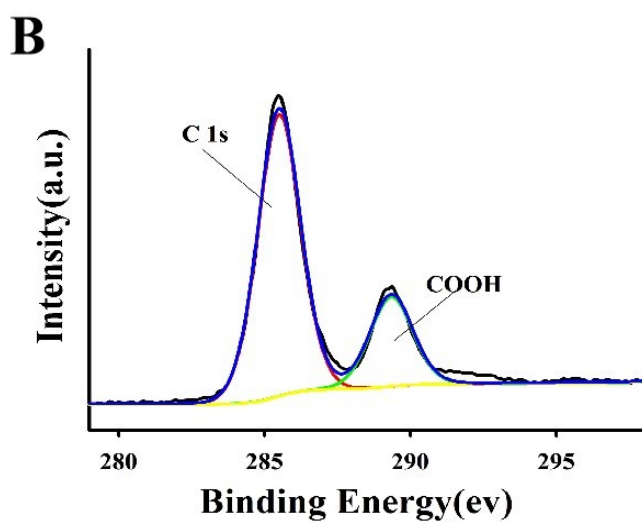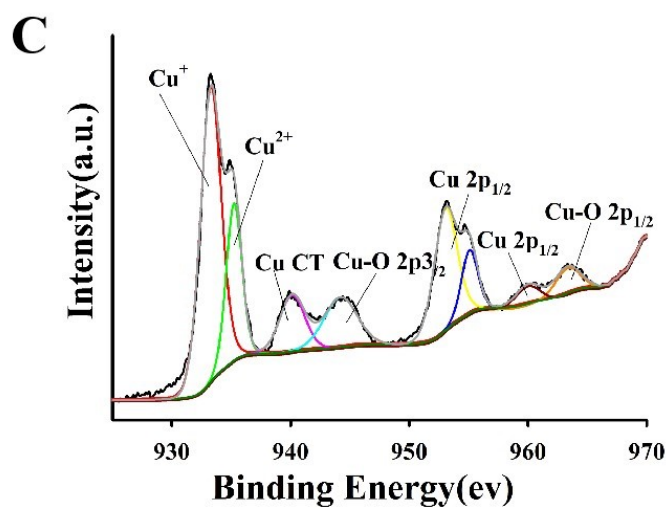

Fig.S2 The XPS of O 1s, C 1s and Cu 2p<sub>3</sub>.

**Table S1** The energy spectrum (EDS) of Cu-MOF (A) and Cu-MOF/I(B)

| <b>A</b> | <b>Element</b> | <b>PEAK<br/>AREA</b> | <b>ABS<br/>CORM</b> | <b>WEIGHT%</b> |
|----------|----------------|----------------------|---------------------|----------------|
|          | C K            | 10219                | 1.000               | 43.44          |
| O K      | 3819           | 1.000                | 13.31               |                |
| Ni K     | 3414           | 1.000                | 8.18                |                |
| Cu K     | 13338          | 1.000                | 35.07               |                |
| Totals   |                |                      | 100.00              |                |

| <b>B</b> | <b>Element</b> | <b>PEAK<br/>AREA</b> | <b>ABS<br/>CORM</b> | <b>WEIGHT%</b> |
|----------|----------------|----------------------|---------------------|----------------|
|          | C K            | 988                  | 1.000               | 4.88           |
| O K      | 1086           | 1.000                | 7.32                |                |
| K K      | 4              | 1.000                | 0.01                |                |
| Ni K     | 17456          | 1.000                | 48.64               |                |
| Cu K     | 9024           | 1.000                | 27.58               |                |
| I L      | 2756           | 1.000                | 11.58               |                |
| Totals   |                |                      | 100.00              |                |

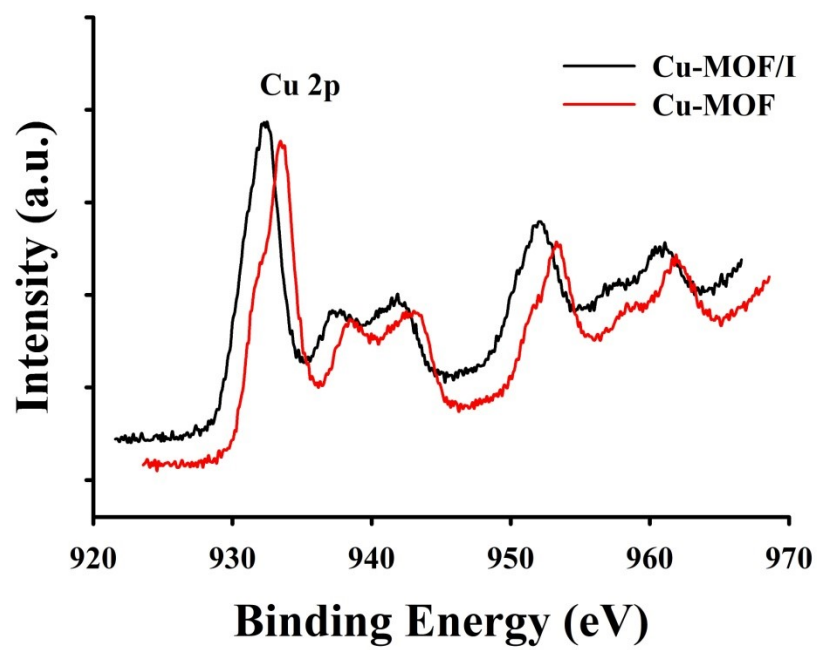

Fig. S3 The XPS of Cu 2p3 before and after adsorption of I<sup>-</sup>

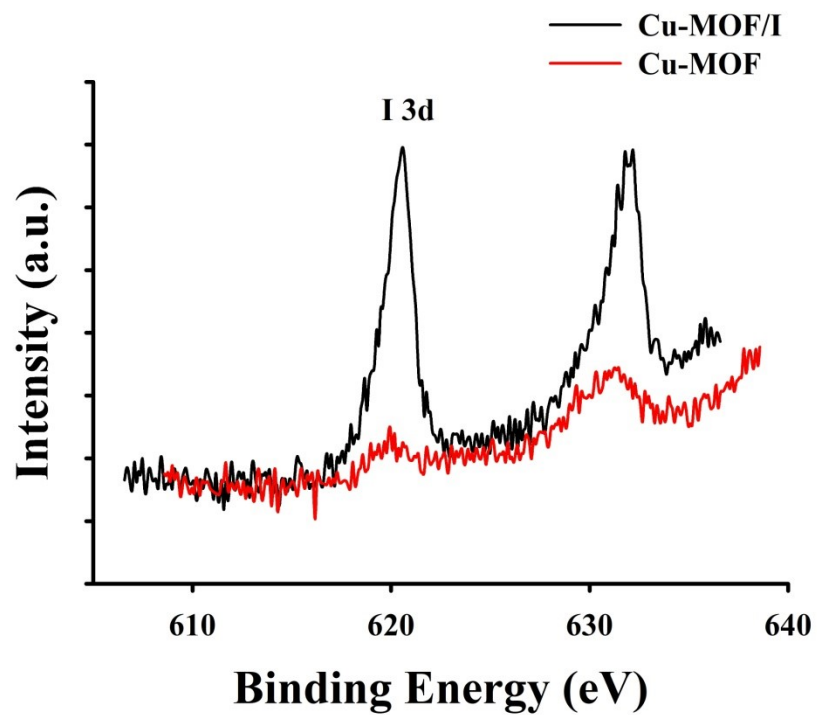

Fig. S4 The XPS of I 3d before and after adsorption of I<sup>-</sup>

Sample: Micropore analysis  
Operator: zkbc  
Submitter:  
File: E:\RESULT\190427-65.1\CU-MOF\CU-MOF.SMP

Started: 5/15/2019 7:31:43 PM  
Completed: 5/17/2019 9:16:30 AM  
Report Time: 5/17/2019 8:06:33 PM  
Sample Mass: 0.0721 g  
Cold Free Space: 87.1974 cm<sup>3</sup>  
Low Pressure Dose: 20.0000 cm<sup>3</sup>/g STP  
Automatic Degas: No  
Analysis Adsorptive: N2  
Analysis Bath Temp.: -195.800 °C  
Thermal Correction: Yes  
Warm Free Space: 28.5407 cm<sup>3</sup> Entered  
Equilibration Interval: 30 s  
Sample Density: 1.000 g/cm<sup>3</sup>

### Summary Report

#### Surface Area

Single point surface area at  $p/p^{\circ} = 0.300000000$ : 217.2765 m<sup>2</sup>/g

BET Surface Area: 238.6704 m<sup>2</sup>/g

Langmuir Surface Area: 300.1052 m<sup>2</sup>/g

t-Plot Micropore Area: 228.7431 m<sup>2</sup>/g

t-Plot External Surface Area: 9.9273 m<sup>2</sup>/g

BJH Adsorption cumulative surface area of pores  
between 1.0000 nm and 300.0000 nm diameter: 23.879 m<sup>2</sup>/g

BJH Desorption cumulative surface area of pores  
between 1.0000 nm and 300.0000 nm diameter: 16.0203 m<sup>2</sup>/g

D-H Adsorption cumulative surface area of pores  
between 1.7000 nm and 300.0000 nm diameter: 12.737 m<sup>2</sup>/g

D-H Desorption cumulative surface area of pores  
between 1.7000 nm and 300.0000 nm diameter: 14.9811 m<sup>2</sup>/g

#### Pore Volume

Single point adsorption total pore volume of pores  
less than 186.5677 nm diameter at  $p/p^{\circ} = 0.989625024$ : 0.128046 cm<sup>3</sup>/g

t-Plot micropore volume: 0.105247 cm<sup>3</sup>/g

BJH Adsorption cumulative volume of pores  
between 1.0000 nm and 300.0000 nm diameter: 0.025814 cm<sup>3</sup>/g

BJH Desorption cumulative volume of pores  
between 1.0000 nm and 300.0000 nm diameter: 0.024469 cm<sup>3</sup>/g

#### Pore Size

Adsorption average pore diameter (4V/A by BET): 2.14599 nm

BJH Adsorption average pore diameter (4V/A): 4.3241 nm

BJH Desorption average pore diameter (4V/A): 6.1096 nm

**Fig. S5** The surface area and pore size for Cu MOF.

Sample: Micropore analysis  
Operator: zkbc  
Submitter:  
File: E:\RESULT\190427-65.1\CU-MOF I\CU-MOF I.SMP

|                                                   |                                                  |
|---------------------------------------------------|--------------------------------------------------|
| Started: 5/15/2019 7:31:43 PM                     | Analysis Adsorptive: N2                          |
| Completed: 5/17/2019 9:16:30 AM                   | Analysis Bath Temp.: -195.800 °C                 |
| Report Time: 5/17/2019 8:09:55 PM                 | Thermal Correction: Yes                          |
| Sample Mass: 0.0663 g                             | Warm Free Space: 28.3873 cm <sup>3</sup> Entered |
| Cold Free Space: 85.2517 cm <sup>3</sup>          | Equilibration Interval: 30 s                     |
| Low Pressure Dose: 20.0000 cm <sup>3</sup> /g STP | Sample Density: 1.000 g/cm <sup>3</sup>          |
| Automatic Degas: No                               |                                                  |

### Summary Report

#### Surface Area

Single point surface area at  $p/p^\circ = 0.300000000$ : 771.6219 m<sup>2</sup>/g

BET Surface Area: 844.6516 m<sup>2</sup>/g

Langmuir Surface Area: 1,069.5418 m<sup>2</sup>/g

t-Plot Micropore Area: 803.6673 m<sup>2</sup>/g

t-Plot External Surface Area: 40.9843 m<sup>2</sup>/g

BJH Adsorption cumulative surface area of pores  
between 1.0000 nm and 300.0000 nm diameter: 69.647 m<sup>2</sup>/g

BJH Desorption cumulative surface area of pores  
between 1.0000 nm and 300.0000 nm diameter: 49.9485 m<sup>2</sup>/g

D-H Adsorption cumulative surface area of pores  
between 1.7000 nm and 300.0000 nm diameter: 41.852 m<sup>2</sup>/g

D-H Desorption cumulative surface area of pores  
between 1.7000 nm and 300.0000 nm diameter: 46.0950 m<sup>2</sup>/g

#### Pore Volume

Single point adsorption total pore volume of pores  
less than 201.2477 nm diameter at  $p/p^\circ = 0.990391909$ : 0.397940 cm<sup>3</sup>/g

t-Plot micropore volume: 0.370825 cm<sup>3</sup>/g

BJH Adsorption cumulative volume of pores  
between 1.0000 nm and 300.0000 nm diameter: 0.030631 cm<sup>3</sup>/g

BJH Desorption cumulative volume of pores  
between 1.0000 nm and 300.0000 nm diameter: 0.028468 cm<sup>3</sup>/g

#### Pore Size

Adsorption average pore diameter (4V/A by BET): 1.88452 nm

BJH Adsorption average pore diameter (4V/A): 1.7592 nm

BJH Desorption average pore diameter (4V/A): 2.2798 nm

**Fig. S6 The surface area and pore size for Cu MOF/I.**



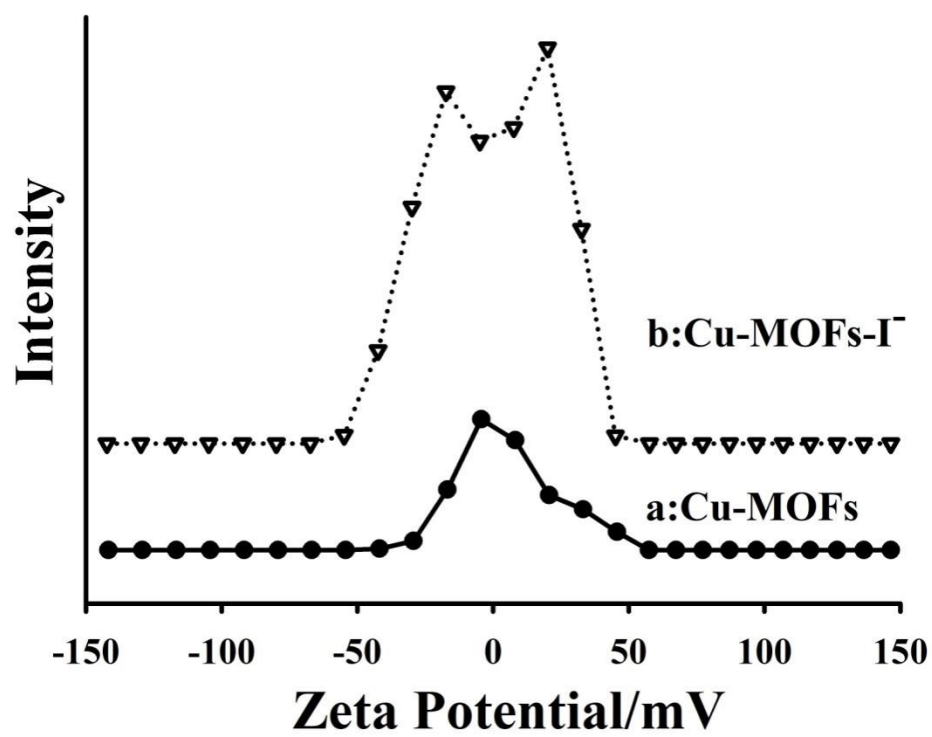

Fig. S7 ZETA potential analysis: (a) Cu-MOF and (b) Cu-MOF/I

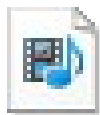

a5e7d68d3dc451b75d3a5c38d8dedd1a.mp4

**Video 1.** The system upon the addition of KSCN or  $K_3[Fe(CN)_6]$ .

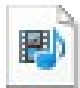

8b000ee426aadfbef7dec70db3a0fef.mp4

**Video 2.** The incubation time of sensing system upon the addition of  $Fe^{3+}$  or  $Fe^{2+}$ .

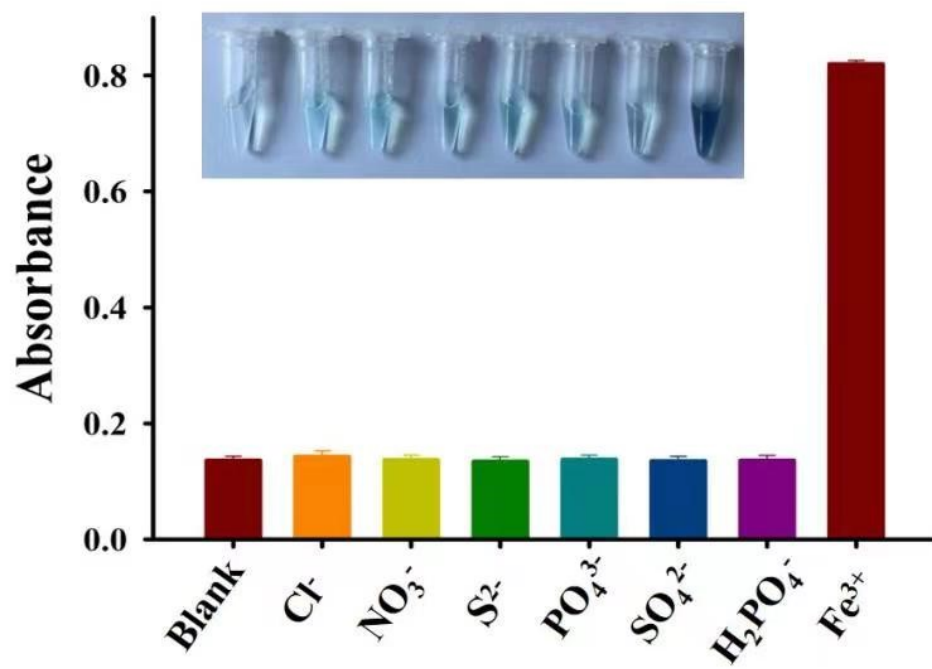

**Fig. S8** The UV-vis intensity of the system under different kinds of anions. Concentration: 50  $\mu$ M.

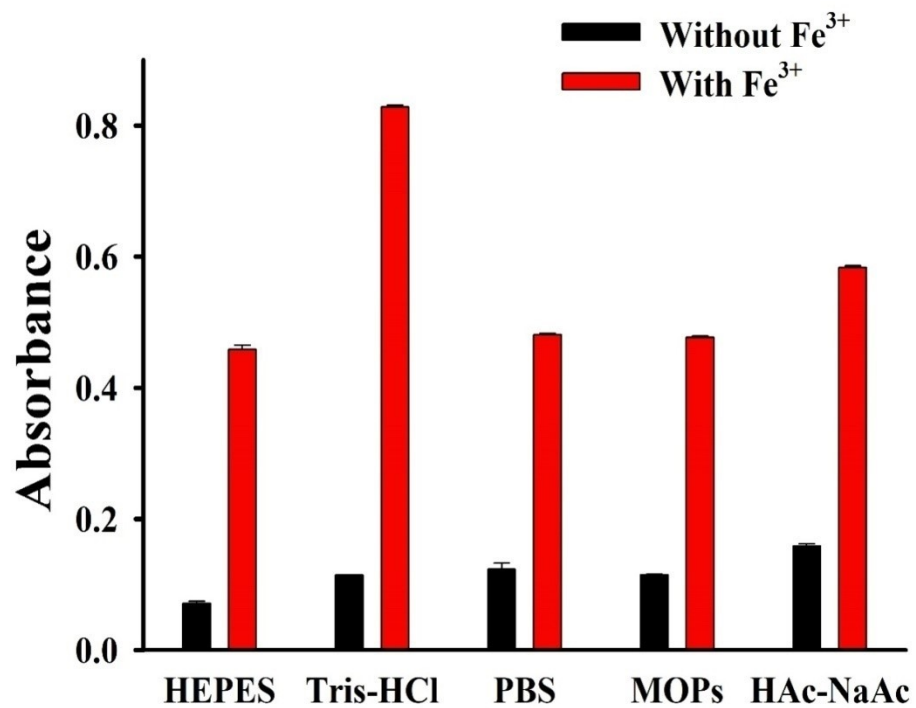

**Fig. S9** Effect of the Types of buffer solutions ([Cu-MOF] = 0.2 mg/mL, [Fe<sup>3+</sup>] = 50  $\mu$ M, [I<sup>-</sup>] = 2 mM).
